# Supplementary material for: Discriminating from species of Curcumae Radix (Yujin) by a UHPLC/Q-TOFMS-based metabolomics approach
Source: Springer Nature journal article supplement (doi:10.1186/s13020-016-0095-8), 2016-04-29

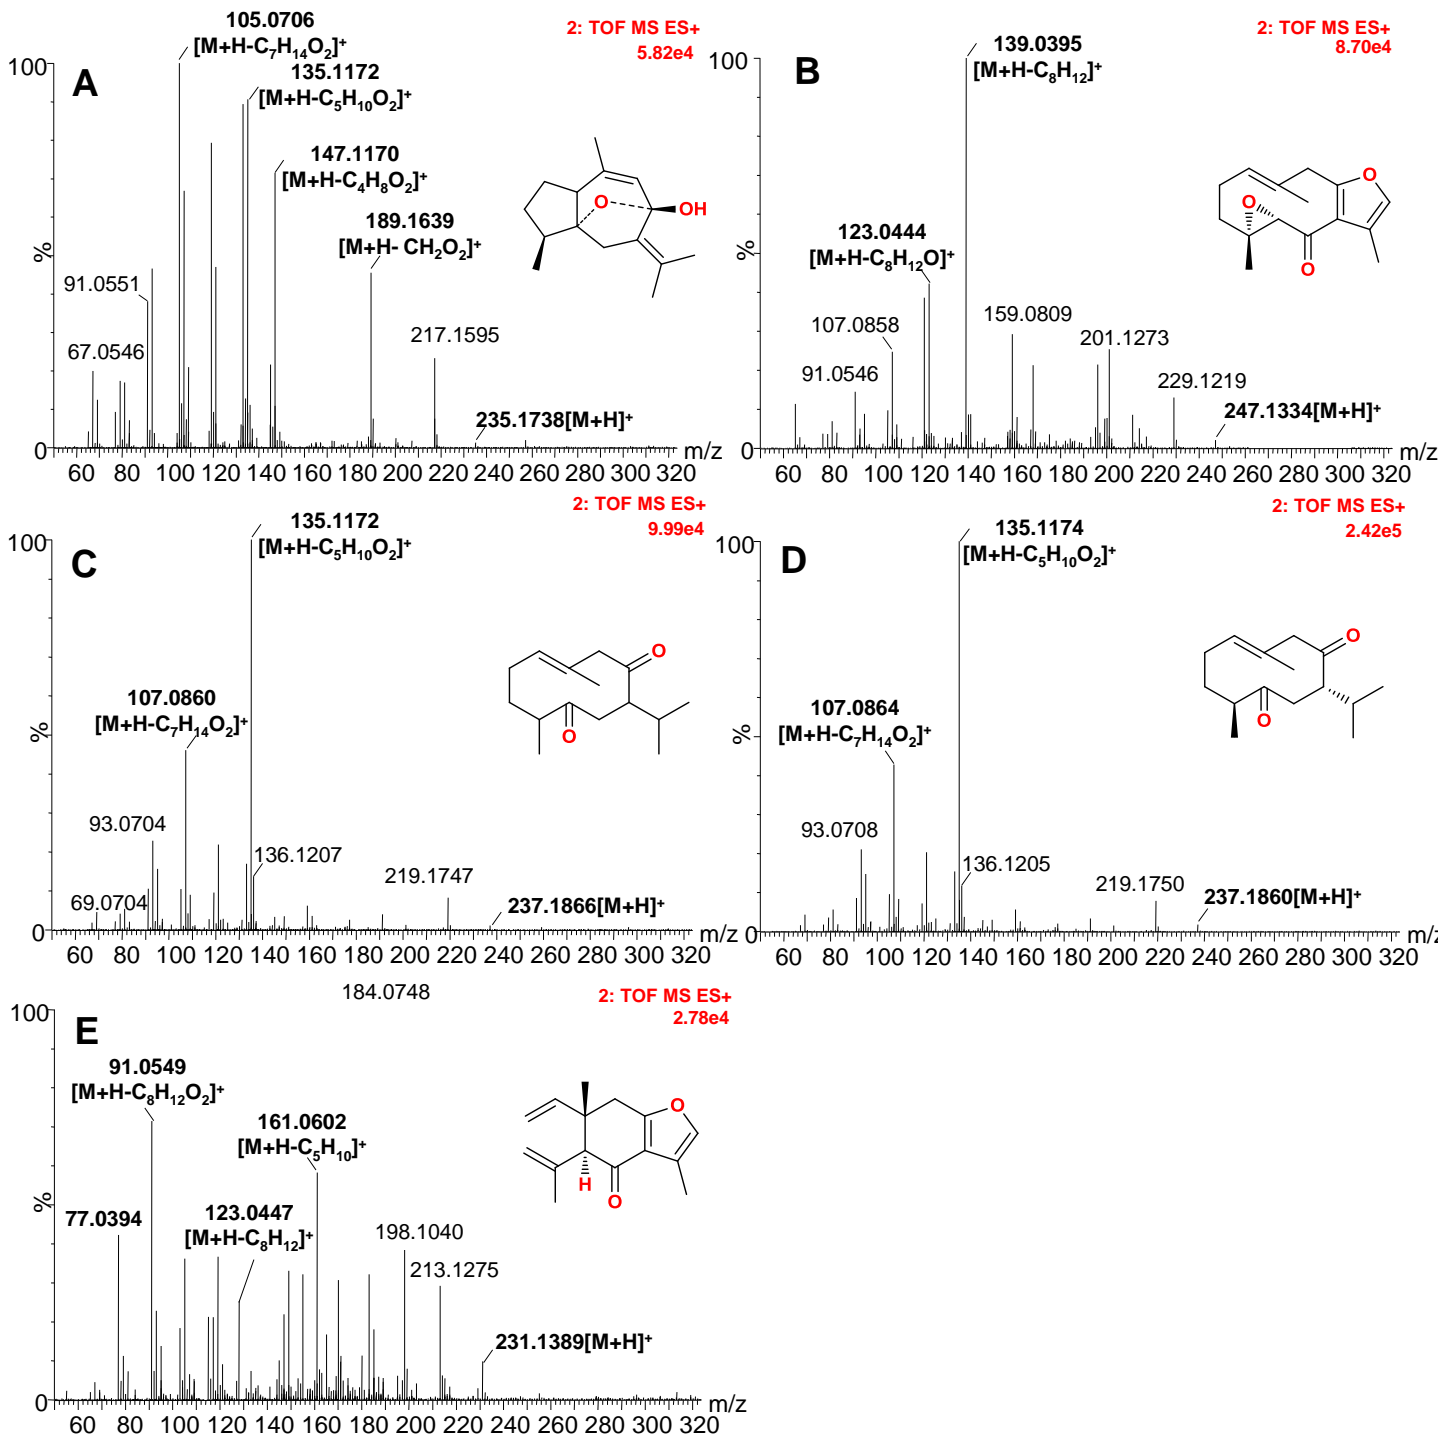

Supplement: MOESM1 [file 10111684]
